# Supplementary material for: Empirical Evaluation of the Mass Balance Model in Human Bodyweight Regulation
Source: Research Square preprint supplement (doi:10.21203/rs.3.rs-8576437/v1), 2026-01-13
Supplement: Supplementary file 1 [file 262872d7c68018b41ef62ae3.docx]

**Supplementary Data**

**Derivation of (Eq.11)**

Rewriting (Eq.9) as a standard first order linear equation and then multiplying by the integrating factor exp(*k*1*t*) yields

.

Observe that this equation is also equivalent to

.

Integration with respect to *t* produces

(Eq.S1)

where *C* is the integration constant. If at *t* = 0, *BW*(0) = *BW*0, then *C* becomes

.

Therefore, solving (Eq.S1) for *BW*(*t*) after substituting *C* gives

which is equation (Eq.11).

**Derivation of (Eq.12)**

If we let, , then (Eq.10) becomes

(Eq.S2)

and

. (Eq.S3)

Also, if *NMI* is constant over time, then differentiation *u* with respect to *t* yields

. (Eq.S4)

Substitution (Eq.S2) and (Eq.S3) into (Eq.S4) gives

.

Solving by separation of variables

(Eq.S5)

where *C* is the integration constant. If at *t* = 0, , then *C* becomes

.

Rearranging (Eq.S5) after substituting *C* generates

.

In exponential form the latter result is equivalent to

which can also be rewritten as

.

Applying the Lambert W function at both sides gives

.

Since ; the latter result becomes

.

Finally, solving for *BW*(*t*) yields

which is equation (Eq.12).

**Derivation of (Eq.25)**

Note that equation (Eq.24) can be rewritten as

.

Integration yields

(Eq.S6)

where *C* is the integration constant. If at *t* = 0, *BW*(0) = *BW*0, then *C* becomes

.

Solving (Eq.S6) for *BW* after substituting *C* yields

which is equation (Eq.25).

**Fasting Data**

| **Days** | **Levanzin BW (kg)** |
| --- | --- |
| 0 | 60.64 |
| 1 | 59.6 |
| 2 | 58.68 |
| 3 | 57.79 |
| 4 | 57.03 |
| 5 | 56.37 |
| 6 | 55.89 |
| 7 | 55.5 |
| 8 | 55.08 |
| 9 | 54.63 |
| 10 | 54.13 |
| 11 | 53.88 |
| 12 | 53.56 |
| 13 | 53.45 |
| 14 | 53.15 |
| 15 | 52.84 |
| 16 | 52.26 |
| 17 | 51.79 |
| 18 | 51.5 |
| 19 | 51.11 |
| 20 | 50.93 |
| 21 | 50.49 |
| 22 | 50.13 |
| 23 | 49.96 |
| 24 | 49.62 |
| 25 | 49.33 |
| 26 | 49.02 |
| 27 | 48.7 |
| 28 | 48.46 |
| 29 | 48.1 |
| 30 | 47.69 |
| 31 | 47.39 |

**Fasting Data**

| **Days** | **Kerndt et al. BW (kg)** |
| --- | --- |
| 0 | 68.6 |
| 1 | 67.44 |
| 2 | 66.42 |
| 3 | 65.56 |
| 4 | 64.51 |
| 5 | 64.22 |
| 6 | 63.17 |
| 7 | 62.43 |
| 8 | 61.96 |
| 9 | 61.34 |
| 10 | 60.74 |
| 11 | 60.37 |
| 12 | 60.18 |
| 13 | 59.48 |
| 14 | 59.28 |
| 15 | 59.14 |
| 16 | 58.57 |
| 17 | 58.37 |
| 18 | 57.92 |
| 19 | 57.4 |
| 20 | 57.23 |
| 21 | 56.94 |
| 22 | 56.64 |
| 23 | 56.44 |
| 24 | 55.85 |
| 25 | 55.6 |
| 26 | 55.4 |
| 27 | 55.21 |
| 28 | 54.74 |
| 29 | 54.56 |
| 30 | 54.42 |
| 31 | 53.87 |
| 32 | 53.62 |
| 33 | 53.28 |
| 34 | 53.23 |
| 35 | 52.83 |

**Fasting Data**

| **Days** | **Schenk, 1906 (kg)** | **Beauté, 1907 (kg)** | **Jacques, 1888 (kg)** |
| --- | --- | --- | --- |
| 0 | 56.3 | 65.61 | 62.01 |
| 1 | 54.4 | 64.57 | 60.68 |
| 2 | 53.6 | 63.72 | 59.74 |
| 3 | 53.2 | 62.77 | 59.23 |
| 4 | 52.5 | 61.96 | 59.24 |
| 5 | 51.9 | 61.41 | 58.98 |
| 6 | 51.2 | 60.83 | 58.35 |
| 7 | 50.9 | 60.23 | 58.55 |
| 8 | 50.6 | 60.04 | 56.68 |
| 9 | 50.5 | 59.8 | 56.23 |
| 10 | 50.2 | 59.11 | 56.23 |
| 11 | 49.9 | 58.64 | 55.8 |
| 12 | 49.5 | 58.64 | 55.6 |
| 13 | 49.1 | 58.37 | 54.67 |
| 14 | 48.8 | 57.78 | 54.67 |
| 15 | 48.4 |  | 55.04 |
| 16 | 48.2 |  | 54.98 |
| 17 |  |  | 55.06 |
| 18 |  |  | 54.81 |
| 19 |  |  | 53.93 |
| 20 |  |  | 53.93 |
| 21 |  |  | 53.82 |
| 22 |  |  | 53.36 |
| 23 |  |  | 53 |
| 24 |  |  | 52.74 |
| 25 |  |  | 52.46 |
| 26 |  |  | 52.4 |
| 27 |  |  | 51.89 |
| 28 |  |  | 52.23 |
| 29 |  |  | 51.86 |
| 30 |  |  | 51.69 |

**Fasting Data**

| **Succi** | | | | | | | |
| --- | --- | --- | --- | --- | --- | --- | --- |
| **Days** | **London** | **Paris** | **Rome** | **Florence** | **Milan** | **Naples** | **Zurich** |
| 0 | 55.8 | 63 | 65.1 | 63.3 | 61.3 | 63.6 | 71.7 |
| 1 | 54.9 | 59.4 | 64.7 | 62.4 | 59.75 | 61.8 |  |
| 2 | 53.9 | 59 | 64 | 61 | 58.95 | 60.6 |  |
| 3 | 52.8 | 58 | 63.3 | 59.8 | 58.2 | 59.8 | 68.5 |
| 4 | 52.1 | 57.4 | 62.8 | 59.9 | 57.7 | 59.1 | 68 |
| 5 | 51.5 | 57.1 | 61.2 | 59.3 | 56.85 | 58.2 | 67.55 |
| 6 | 51 | 57 | 60.9 | 58.65 | 56.3 | 57.5 | 67.25 |
| 7 | 50.4 | 56.9 | 60.7 | 58.15 | 56.1 | 57.1 | 66.55 |
| 8 | 50.1 | 56 | 59.3 | 57.65 | 55.6 | 56.9 |  |
| 9 | 49.8 | 55.7 | 59.1 | 57.25 | 55.4 | 57.2 | 65.7 |
| 10 | 49.7 | 55.3 | 59 | 56.7 | 54.4 | 56.5 | 65.4 |
| 11 | 49.3 | 54 | 59 | 56.25 | 54.3 | 55.9 | 65 |
| 12 | 48.9 | 53.2 | 58.9 | 55.6 | 54 | 55.5 | 64.55 |
| 13 | 48.7 |  | 58.55 | 55.25 | 53.6 | 55.4 | 64.05 |
| 14 | 48.3 | 53 | 58.2 | 54.85 | 53.1 | 55.3 |  |
| 15 | 48.1 | 52.7 | 58 | 54.6 | 52.85 | 55.25 | 63.5 |
| 16 | 47.55 | 52.5 | 57.8 | 54.3 | 52.6 | 54.6 | 63 |
| 17 | 47.25 | 52.2 | 57.6 | 54.1 | 52.1 | 54 | 62.75 |
| 18 | 47.1 | 51.9 | 57.5 | 53.65 | 51.35 | 53.5 | 62.5 |
| 19 | 46.8 | 51.6 | 57.05 | 53.2 | 51.15 | 53 | 62.2 |
| 20 | 46.5 | 51.2 | 56.5 | 52.8 | 50.9 | 52.4 | 61.9 |
| 21 | 46.3 |  |  | 52.6 | 50.9 |  |  |
| 22 | 45.9 | 50.75 |  | 52.25 | 50.6 |  |  |
| 23 | 45.6 | 50.2 |  | 51.85 | 50.15 |  |  |
| 24 | 45.4 | 50.1 |  | 51.45 | 49.7 |  |  |
| 25 | 45.2 | 50 |  | 51.5 | 49.4 |  |  |
| 26 | 44.9 | 49.65 |  | 51.3 | 49 |  |  |
| 27 | 44.6 | 49.5 |  | 51.25 | 48.7 |  |  |
| 28 | 44.3 | 49.25 |  | 51.05 | 48.5 |  |  |
| 29 | 44.2 | 48.75 |  | 50.45 | 48.2 |  |  |
| 30 | 44.1 |  |  |  |  |  |  |
| 31 | 43.8 |  |  |  |  |  |  |
| 32 | 43.7 |  |  |  |  |  |  |
| 33 | 43.5 |  |  |  |  |  |  |
| 34 | 43.2 |  |  |  |  |  |  |
| 35 | 43 |  |  |  |  |  |  |
| 36 | 42.75 |  |  |  |  |  |  |
| 37 | 42.6 |  |  |  |  |  |  |
| 38 | 42.3 |  |  |  |  |  |  |
| 39 | 41.7 |  |  |  |  |  |  |

**Singel-subject Baseline Data**

| **Date** | **Day** | **BW (kg)** | **NMI (kg)** | **S (kg)** | **B (kg)** | **WL (kg)** | **BF (%)** | **FM (kg)** | **Age (yrs.)** |
| --- | --- | --- | --- | --- | --- | --- | --- | --- | --- |
| August 18, 2020 | 0 | 87 | 1.387 | 0.99 | 6.493 | 6.096 | ------ | ------ | 46 |
| August 19, 2020 | 1 | 86.4 | 2.274 | 1.416 | 5.28 | 4.422 | ------ | ------ | 46 |
| August 20, 2020 | 2 | 86.8 | 0.775 | 1.232 | 5.534 | 5.991 | ------ | ------ | 46 |
| August 21, 2020 | 3 | 86.6 | 1.966 | 0.952 | 6.162 | 5.148 | ------ | ------ | 46 |
| August 22, 2020 | 4 | 86.6 | 1.541 | 1.118 | 6.818 | 6.395 | ------ | ------ | 46 |
| August 23, 2020 | 5 | 86.6 | 2.426 | 1.151 | 6.815 | 5.54 | ------ | ------ | 46 |
| August 24, 2020 | 6 | 86.6 | 1.57 | 1.059 | 5.361 | 4.85 | ------ | ------ | 46 |
| August 25, 2020 | 7 | 86.5 | 1.643 | 1.116 | 5.466 | 4.939 | ------ | ------ | 46 |
| August 26, 2020 | 8 | 86.1 | 2.085 | 1.098 | 4.9 | 3.913 | ------ | ------ | 46 |
| August 27, 2020 | 9 | 86.6 | 1.229 | 1.041 | 5.736 | 5.548 | ------ | ------ | 46 |
| August 28, 2020 | 10 | 86.3 | 2.72 | 1.314 | 5.927 | 4.521 | ------ | ------ | 46 |
| August 29, 2020 | 11 | 86.7 | 2.495 | 1.312 | 5.259 | 4.076 | ------ | ------ | 46 |
| August 30, 2020 | 12 | 87.2 | 0.843 | 1.044 | 5.108 | 5.309 | ------ | ------ | 46 |
| August 31, 2020 | 13 | 86.7 | 1.446 | 1.039 | 5.457 | 5.05 | ------ | ------ | 46 |
| September 1, 2020 | 14 | 86.5 | 2.321 | 1.218 | 5.233 | 4.13 | ------ | ------ | 46 |
| September 2, 2020 | 15 | 86.8 | 1.071 | 1.005 | 4.835 | 4.769 | ------ | ------ | 46 |
| September 3, 2020 | 16 | 86.5 | 1.468 | 0.978 | 5.499 | 5.009 | ------ | ------ | 46 |
| September 4, 2020 | 17 | 86.6 | 1.69 | 0.988 | 5.842 | 5.14 | ------ | ------ | 46 |
| September 5, 2020 | 18 | 86.8 | 2.034 | 1.185 | 5.686 | 4.837 | ------ | ------ | 46 |
| September 6, 2020 | 19 | 86.8 | 1.929 | 1.223 | 6.344 | 5.638 | ------ | ------ | 46 |
| September 7, 2020 | 20 | 86.5 | 2.242 | 1.102 | 4.594 | 3.454 | ------ | ------ | 46 |
| September 8, 2020 | 21 | 86.3 | 1.739 | 1.123 | 4.607 | 3.991 | ------ | ------ | 46 |
| September 9, 2020 | 22 | 86.3 | 1.004 | 1.087 | 4.256 | 4.339 | ------ | ------ | 46 |
| September 10, 2020 | 23 | 86.1 | 1.752 | 1.253 | 5.647 | 5.148 | ------ | ------ | 46 |
| September 11, 2020 | 24 | 86.6 | 1.788 | 1.253 | 5.871 | 5.336 | ------ | ------ | 46 |
| September 12, 2020 | 25 | 86.6 | 1.404 | 1.173 | 6.594 | 6.363 | ------ | ------ | 46 |
| September 13, 2020 | 26 | 87 | 1.31 | 1.098 | 4.803 | 4.591 | ------ | ------ | 46 |
| September 14, 2020 | 27 | 86.9 | 1.077 | 0.935 | 5.802 | 5.66 | ------ | ------ | 46 |
| September 15, 2020 | 28 | 86.5 | 2.135 | 1.093 | 5.644 | 4.602 | ------ | ------ | 46 |
| September 16, 2020 | 29 | 86.9 | 1.367 | 1.08 | 5.216 | 4.929 | ------ | ------ | 46 |

**Singel-subject Intake Restriction Data**

| **Date** | **Day** | **BW (kg)** | **NMI (kg)** | **S (kg)** | **B (kg)** | **WL (kg)** | **BF (%)** | **FM (kg)** | **Age (yrs.)** |
| --- | --- | --- | --- | --- | --- | --- | --- | --- | --- |
| September 17, 2020 | 30 | 86.7 | 2.111 | 1.001 | 5.341 | 4.231 | 22.4 | 19.4208 | 46 |
| September 18, 2020 | 31 | 86.4 | 1.499 | 0.754 | 5.684 | 4.939 | 22.3 | 19.2672 | 46 |
| September 19, 2020 | 32 | 85.8 | 2.176 | 0.889 | 6.25 | 4.963 | 22.4 | 19.2192 | 46 |
| September 20, 2020 | 33 | 86 | 2.052 | 0.845 | 5.773 | 4.566 | 22 | 18.92 | 46 |
| September 21, 2020 | 34 | 86 | 1.089 | 0.664 | 5.054 | 4.629 | 21.6 | 18.576 | 46 |
| September 22, 2020 | 35 | 85.5 | 1.667 | 0.775 | 5.663 | 4.771 | 21.7 | 18.5535 | 46 |
| September 23, 2020 | 36 | 85.2 | 1.86 | 0.767 | 5.302 | 4.209 | 21.8 | 18.5736 | 46 |
| September 24, 2020 | 37 | 85.4 | 1.614 | 0.659 | 5.403 | 4.448 | 22 | 18.788 | 46 |
| September 25, 2020 | 38 | 85.2 | 1.475 | 0.66 | 5.969 | 5.154 | 21.8 | 18.5736 | 46 |
| September 26, 2020 | 39 | 84.8 | 1.148 | 0.752 | 6.261 | 5.865 | 21.9 | 18.5712 | 46 |
| September 27, 2020 | 40 | 84.5 | 2.1 | 0.733 | 5.74 | 4.373 | 22 | 18.59 | 46 |
| September 28, 2020 | 41 | 84.8 | 1.73 | 0.675 | 5.349 | 4.294 | 21.8 | 18.4864 | 46 |
| September 29, 2020 | 42 | 84.6 | 1.411 | 0.721 | 5.818 | 5.128 | 21.3 | 18.0198 | 46 |
| September 30, 2020 | 43 | 84.3 | 2.263 | 0.684 | 5.209 | 3.63 | 21.5 | 18.1245 | 46 |
| October 1, 2020 | 44 | 84.5 | 1.468 | 0.743 | 5.925 | 5.2 | 21.5 | 18.1675 | 46 |
| October 2, 2020 | 45 | 84.3 | 1.328 | 0.761 | 5.333 | 4.766 | 21.4 | 18.0402 | 46 |
| October 3, 2020 | 46 | 84.4 | 1.848 | 0.694 | 6.068 | 4.914 | 21.6 | 18.2304 | 46 |
| October 4, 2020 | 47 | 84 | 1.424 | 0.705 | 5.948 | 5.229 | 21.6 | 18.144 | 46 |
| October 5, 2020 | 48 | 83.9 | 1.496 | 0.728 | 5.572 | 4.804 | 21.4 | 17.9546 | 46 |
| October 6, 2020 | 49 | 83.7 | 1.596 | 0.858 | 5.228 | 4.49 | 21.5 | 17.9955 | 46 |
| October 7, 2020 | 50 | 83.8 | 1.801 | 0.68 | 5.034 | 3.913 | 21.8 | 18.2684 | 46 |
| October 8, 2020 | 51 | 84.1 | 1.277 | 0.736 | 5.632 | 5.091 | 21.4 | 17.9974 | 46 |
| October 9, 2020 | 52 | 83.6 | 1.711 | 0.732 | 6.604 | 5.625 | 21.1 | 17.6396 | 46 |
| October 10, 2020 | 53 | 83.2 | 2.029 | 0.796 | 5.892 | 4.659 | 21.2 | 17.6384 | 46 |
| October 11, 2020 | 54 | 83.5 | 1.843 | 0.735 | 6.932 | 5.824 | 21.2 | 17.702 | 46 |
| October 12, 2020 | 55 | 83.5 | 2.137 | 0.691 | 5.781 | 4.335 | 21 | 17.535 | 46 |
| October 13, 2020 | 56 | 83.5 | 1.465 | 0.675 | 4.17 | 3.38 | 20.9 | 17.4515 | 46 |
| October 14, 2020 | 57 | 83.5 | 0.451 | 0.675 | 4.316 | 4.54 | 21.2 | 17.702 | 46 |
| October 15, 2020 | 58 | 83.3 | 0.869 | 0.675 | 5.054 | 4.86 | 21.4 | 17.8262 | 46 |
| October 16, 2020 | 59 | 82.9 | 1.379 | 0.67 | 5.83 | 5.121 | 20.5 | 16.9945 | 46 |
| October 17, 2020 | 60 | 82.8 | 0.989 | 0.775 | 5.872 | 5.658 | 20.1 | 16.6428 | 46 |
| October 18, 2020 | 61 | 82.7 | 2.553 | 0.724 | 7.005 | 5.176 | 20 | 16.54 | 46 |
| October 19, 2020 | 62 | 83 | 1.94 | 0.657 | 4.638 | 3.355 | 20.2 | 16.766 | 46 |
| October 20, 2020 | 63 | 82.7 | 1.295 | 0.772 | 6.145 | 5.622 | 20 | 16.54 | 46 |
| October 21, 2020 | 64 | 82.6 | 2.347 | 0.722 | 5.803 | 4.178 | 19.9 | 16.4374 | 46 |
| October 22, 2020 | 65 | 82.2 | 1.598 | 0.787 | 4.544 | 3.733 | 19.8 | 16.2756 | 46 |
| October 23, 2020 | 66 | 82.4 | 1.291 | 0.679 | 5.381 | 4.769 | 19.9 | 16.3976 | 46 |
| October 24, 2020 | 67 | 82 | 2.094 | 0.723 | 5.635 | 4.264 | 19.7 | 16.154 | 46 |
| October 25, 2020 | 68 | 82.2 | 1.815 | 0.791 | 5.717 | 4.693 | 19.8 | 16.2756 | 46 |
| October 26, 2020 | 69 | 82.4 | 1.492 | 0.685 | 4.808 | 4.001 | 19.9 | 16.3976 | 46 |
| October 27, 2020 | 70 | 82.5 | 1.318 | 0.661 | 4.921 | 4.264 | 19.8 | 16.335 | 46 |
| October 28, 2020 | 71 | 82.2 | 1.351 | 0.681 | 3.994 | 3.324 | 19.8 | 16.2756 | 46 |
| October 29, 2020 | 72 | 82.2 | 0.877 | 0.698 | 5.328 | 5.149 | 19.7 | 16.1934 | 46 |
| October 30, 2020 | 73 | 81.8 | 1.353 | 0.731 | 6.337 | 5.715 | 19.6 | 16.0328 | 46 |
| October 31, 2020 | 74 | 81.3 | 1.645 | 0.753 | 6.283 | 5.391 | 19.3 | 15.6909 | 46 |
| November 1, 2020 | 75 | 81.7 | 1.587 | 0.691 | 5.763 | 4.867 | 19.5 | 15.9315 | 46 |
| November 2, 2020 | 76 | 81.6 | 1.177 | 0.691 | 5.33 | 4.844 | 19.4 | 15.8304 | 46 |
| November 3, 2020 | 77 | 81.2 | 1.546 | 0.726 | 4.636 | 3.816 | 19.4 | 15.7528 | 46 |
| November 4, 2020 | 78 | 81.4 | 1.458 | 0.68 | 4.254 | 3.476 | 19.4 | 15.7916 | 46 |
| November 5, 2020 | 79 | 81.2 | 1.884 | 0.701 | 5.868 | 4.685 | 19.3 | 15.6716 | 46 |
| November 6, 2020 | 80 | 81.3 | 1.918 | 0.679 | 5.188 | 3.949 | 19.3 | 15.6909 | 46 |
| November 7, 2020 | 81 | 81.2 | 1.777 | 0.708 | 6.347 | 5.278 | 19.4 | 15.7528 | 46 |
| November 8, 2020 | 82 | 81.1 | 0.963 | 0.666 | 6.066 | 5.769 | 19.2 | 15.5712 | 46 |
| November 9, 2020 | 83 | 80.8 | 0.988 | 0.654 | 5.701 | 5.367 | 19 | 15.352 | 46 |
| November 10, 2020 | 84 | 80.5 | 1.376 | 0.699 | 6.586 | 5.909 | 19 | 15.295 | 46 |
| November 11, 2020 | 85 | 80.6 | 1.503 | 0.683 | 5.389 | 4.569 | 19.1 | 15.3946 | 46 |
| November 12, 2020 | 86 | 80.9 | 1.226 | 0.686 | 5.853 | 5.313 | 19.2 | 15.5328 | 46 |
| November 13, 2020 | 87 | 80.8 | 2.761 | 0.656 | 6.238 | 4.133 | 19 | 15.352 | 46 |
| November 14, 2020 | 88 | 80.8 | 1.273 | 0.678 | 5.92 | 5.325 | 19.1 | 15.4328 | 46 |
| November 15, 2020 | 89 | 80.4 | 1.837 | 0.657 | 5.773 | 4.593 | 18.9 | 15.1956 | 46 |
| November 16, 2020 | 90 | 80.7 | 1.863 | 0.652 | 6.662 | 5.451 | 19 | 15.333 | 46 |
| November 17, 2020 | 91 | 80.7 | 1.482 | 0.682 | 6.241 | 5.441 | 19 | 15.333 | 46 |
| November 18, 2020 | 92 | 80.6 | 1.408 | 0.701 | 5.183 | 4.476 | 19 | 15.314 | 46 |
| November 19, 2020 | 93 | 80.7 | 0.713 | 0.702 | 5.483 | 5.472 | 19 | 15.333 | 46 |
| November 20, 2020 | 94 | 80.1 | 0.617 | 0.746 | 5.322 | 5.451 | 18.8 | 15.0588 | 46 |
| November 21, 2020 | 95 | 80.4 | 1.819 | 0.741 | 6.043 | 4.965 | 18.9 | 15.1956 | 46 |
| November 22, 2020 | 96 | 80.1 | 1.17 | 0.684 | 5.176 | 4.69 | 18.8 | 15.0588 | 46 |
| November 23, 2020 | 97 | 80 | 2.004 | 0.711 | 6.075 | 4.782 | 18.8 | 15.04 | 46 |
| November 24, 2020 | 98 | 79.8 | 1.175 | 0.767 | 5.954 | 5.546 | 18.6 | 14.8428 | 46 |
| November 25, 2020 | 99 | 79.2 | 2.402 | 0.837 | 6.167 | 4.602 | 18.3 | 14.4936 | 46 |
| November 26, 2020 | 100 | 79.9 | 1.053 | 0.738 | 6.476 | 6.161 | 18.5 | 14.7815 | 46 |
| November 27, 2020 | 101 | 79.7 | 1.408 | 0.724 | 5.761 | 5.077 | 18.6 | 14.8242 | 46 |
| November 28, 2020 | 102 | 80 | 1.843 | 0.688 | 6.129 | 4.974 | 18.7 | 14.96 | 46 |
| November 29, 2020 | 103 | 80.3 | 1.845 | 0.653 | 5.415 | 4.223 | 18.9 | 15.1767 | 46 |
| November 30, 2020 | 104 | 80.1 | 1.328 | 0.644 | 4.711 | 4.027 | 18.7 | 14.9787 | 46 |
| December 1, 2020 | 105 | 79.8 | 1.488 | 0.668 | 5.801 | 4.981 | 18.5 | 14.763 | 46 |
| December 2, 2020 | 106 | 79.2 | 1.799 | 0.662 | 4.922 | 3.785 | 18.3 | 14.4936 | 46 |
| December 3, 2020 | 107 | 79.6 | 1.312 | 0.712 | 4.891 | 4.291 | 18.5 | 14.726 | 46 |
| December 4, 2020 | 108 | 79.6 | 1.459 | 0.708 | 4.892 | 4.141 | 18.4 | 14.6464 | 46 |
| December 5, 2020 | 109 | 79.3 | 1.457 | 0.662 | 5.498 | 4.703 | 18.3 | 14.5119 | 46 |
| December 6, 2020 | 110 | 79.4 | 1.49 | 0.693 | 6.43 | 5.633 | 18.4 | 14.6096 | 46 |
| December 7, 2020 | 111 | 79.3 | 1.656 | 0.723 | 6.096 | 5.163 | 18.3 | 14.5119 | 46 |
| December 8, 2020 | 112 | 78.9 | 1.955 | 0.663 | 5.968 | 4.676 | 18.1 | 14.2809 | 46 |
| December 9, 2020 | 113 | 78.7 | 1.614 | 0.644 | 4.802 | 3.832 | 18.2 | 14.3234 | 46 |
| December 10, 2020 | 114 | 78.8 | 1.247 | 0.819 | 6.172 | 5.744 | 18.2 | 14.3416 | 46 |
| December 11, 2020 | 115 | 78.5 | 1.032 | 0.782 | 6.07 | 5.82 | 18 | 14.13 | 46 |
| December 12, 2020 | 116 | 78.4 | 1.595 | 0.858 | 4.961 | 4.224 | 17.9 | 14.0336 | 46 |
| December 13, 2020 | 117 | 78.9 | 1.551 | 0.705 | 6.34 | 5.494 | 18.2 | 14.3598 | 46 |
| December 14, 2020 | 118 | 78.7 | 0.987 | 0.72 | 5.046 | 4.779 | 18 | 14.166 | 46 |
| December 15, 2020 | 119 | 78.8 | 1.653 | 0.715 | 5.402 | 4.464 | 18.1 | 14.2628 | 46 |
| December 16, 2020 | 120 | 78.8 | 0.36 | 0.675 | 5.191 | 5.506 | 18.1 | 14.2628 | 46 |
| December 17, 2020 | 121 | 78 | 1.378 | 0.702 | 5.681 | 5.005 | 17.8 | 13.884 | 46 |
| December 18, 2020 | 122 | 77.7 | 1.649 | 0.755 | 4.667 | 3.773 | 17.6 | 13.6752 | 46 |
| December 19, 2020 | 123 | 77.9 | 1.208 | 0.755 | 5.388 | 4.935 | 17.7 | 13.7883 | 46 |
| December 20, 2020 | 124 | 78.2 | 1.029 | 0.827 | 6.305 | 6.103 | 17.8 | 13.9196 | 46 |
| December 21, 2020 | 125 | 77.8 | 1.358 | 0.807 | 4.385 | 3.834 | 17.7 | 13.7706 | 46 |
| December 22, 2020 | 126 | 78.1 | 1.453 | 0.747 | 5.117 | 4.411 | 17.7 | 13.8237 | 46 |
| December 23, 2020 | 127 | 77.5 | 1.421 | 0.689 | 5.314 | 4.582 | 17.6 | 13.64 | 46 |
| December 24, 2020 | 128 | 77.5 | 1.333 | 0.897 | 6.003 | 5.567 | 17.4 | 13.485 | 46 |
| December 25, 2020 | 129 | 77.5 | 1.112 | 0.7 | 6.008 | 5.596 | 17.6 | 13.64 | 46 |
| December 26, 2020 | 130 | 77.5 | 2.063 | 0.724 | 6.456 | 5.117 | 17.6 | 13.64 | 46 |
| December 27, 2020 | 131 | 77.5 | 2.044 | 0.833 | 5.572 | 4.361 | 17.6 | 13.64 | 46 |
| December 28, 2020 | 132 | 77.5 | 1.507 | 0.67 | 5.646 | 4.809 | 17.6 | 13.64 | 46 |
| December 29, 2020 | 133 | 77.5 | 0.773 | 0.663 | 5.219 | 5.109 | 17.6 | 13.64 | 46 |
| December 30, 2020 | 134 | 77.4 | 0.948 | 0.689 | 5.1 | 4.841 | 17.4 | 13.4676 | 46 |
| December 31, 2020 | 135 | 77.5 | 1.265 | 0.757 | 6.733 | 6.225 | 17.6 | 13.64 | 46 |
| January 1, 2021 | 136 | 77.3 | 1.2 | 0.791 | 5.542 | 5.133 | 17.4 | 13.4502 | 46 |
| January 2, 2021 | 137 | 77.3 | 1.227 | 0.754 | 6.13 | 5.657 | 17.4 | 13.4502 | 46 |
| January 3, 2021 | 138 | 77.2 | 1.905 | 0.765 | 5.624 | 4.484 | 17.3 | 13.3556 | 46 |
| January 4, 2021 | 139 | 77.5 | 0.892 | 0.77 | 4.944 | 4.822 | 17.4 | 13.485 | 46 |
| January 5, 2021 | 140 | 77 | 1.443 | 0.755 | 5.972 | 5.284 | 17.3 | 13.321 | 46 |
| January 6, 2021 | 141 | 77.3 | 1.217 | 0.789 | 5.624 | 5.196 | 17.4 | 13.4502 | 46 |
| January 7, 2021 | 142 | 76.9 | 1.251 | 0.798 | 6.502 | 6.049 | 17.3 | 13.3037 | 46 |
| January 8, 2021 | 143 | 77.2 | 1.631 | 0.748 | 5.039 | 4.156 | 17.3 | 13.3556 | 46 |
| January 9, 2021 | 144 | 77.5 | 1.416 | 0.666 | 6.249 | 5.499 | 17.5 | 13.5625 | 46 |
| January 10, 2021 | 145 | 76.8 | 2.05 | 0.873 | 4.988 | 3.811 | 17.1 | 13.1328 | 46 |
| January 11, 2021 | 146 | 77.5 | 1.543 | 0.89 | 5.967 | 5.314 | 17.3 | 13.4075 | 46 |
| January 12, 2021 | 147 | 77.5 | 0.563 | 0.7 | 5.273 | 5.41 | 17.3 | 13.4075 | 46 |
| January 13, 2021 | 148 | 76.9 | 1.118 | 0.739 | 5.712 | 5.333 | 17.1 | 13.1499 | 46 |
| January 14, 2021 | 149 | 76.7 | 1.051 | 0.67 | 5.776 | 5.395 | 17.1 | 13.1157 | 46 |
| January 15, 2021 | 150 | 76.5 | 1.498 | 0.759 | 5.986 | 5.247 | 17 | 13.005 | 46 |
| January 16, 2021 | 151 | 76.4 | 1.802 | 0.746 | 6.46 | 5.404 | 16.9 | 12.9116 | 46 |
| January 17, 2021 | 152 | 76.5 | 1.725 | 0.772 | 6.493 | 5.54 | 17.1 | 13.0815 | 46 |
| January 18, 2021 | 153 | 76.6 | 1.502 | 0.858 | 5.167 | 4.523 | 17.1 | 13.0986 | 46 |
| January 19, 2021 | 154 | 76.9 | 0.986 | 0.731 | 6.127 | 5.872 | 16.8 | 12.9192 | 46 |
| January 20, 2021 | 155 | 76.2 | 1.207 | 0.771 | 5.323 | 4.887 | 16.8 | 12.8016 | 46 |
| January 21, 2021 | 156 | 76.3 | 1.216 | 0.82 | 5.628 | 5.232 | 16.8 | 12.8184 | 46 |
| January 22, 2021 | 157 | 76.2 | 1.77 | 0.882 | 6.293 | 5.405 | 16.8 | 12.8016 | 46 |
| January 23, 2021 | 158 | 76.6 | 1.701 | 0.701 | 6.842 | 5.842 | 17.1 | 13.0986 | 46 |
| January 24, 2021 | 159 | 76.6 | 1.701 | 1.426 | 4.625 | 4.35 | 17.1 | 13.0986 | 46 |
| January 25, 2021 | 160 | 76.8 | 1.218 | 0.731 | 5.892 | 5.405 | 17.1 | 13.1328 | 46 |
| January 26, 2021 | 161 | 76.6 | 1.212 | 0.73 | 6.804 | 6.322 | 17 | 13.022 | 46 |
| January 27, 2021 | 162 | 76.5 | 1.108 | 0.805 | 6.308 | 6.005 | 16.9 | 12.9285 | 46 |
| January 28, 2021 | 163 | 76.4 | 1.24 | 0.76 | 5.306 | 4.826 | 16.9 | 12.9116 | 46 |
| January 29, 2021 | 164 | 76.1 | 1.295 | 0.692 | 5.089 | 4.486 | 16.8 | 12.7848 | 46 |
| January 30, 2021 | 165 | 76.2 | 1.159 | 0.77 | 6.28 | 5.891 | 16.8 | 12.8016 | 46 |
| January 31, 2021 | 166 | 76.4 | 1.769 | 0.76 | 5.29 | 4.281 | 16.9 | 12.9116 | 46 |
| February 1, 2021 | 167 | 76.7 | 1.581 | 0.698 | 5.232 | 4.349 | 17 | 13.039 | 46 |
| February 2, 2021 | 168 | 76.3 | 1.121 | 0.627 | 5.875 | 5.381 | 16.8 | 12.8184 | 46 |
| February 3, 2021 | 169 | 76 | 1.071 | 0.731 | 5.876 | 5.536 | 16.6 | 12.616 | 46 |
| February 4, 2021 | 170 | 75.7 | 2.16 | 0.743 | 6.337 | 4.92 | 16.7 | 12.6419 | 46 |
| February 5, 2021 | 171 | 75.7 | 1.312 | 0.797 | 6.607 | 6.092 | 16.7 | 12.6419 | 46 |
| February 6, 2021 | 172 | 75.5 | 1.642 | 0.907 | 5.928 | 5.193 | 16.5 | 12.4575 | 46 |
| February 7, 2021 | 173 | 76.1 | 1.643 | 0.724 | 5.151 | 4.232 | 16.8 | 12.7848 | 46 |
| February 8, 2021 | 174 | 76.3 | 1.178 | 0.669 | 4.852 | 4.343 | 16.8 | 12.8184 | 46 |
| February 9, 2021 | 175 | 76 | 2.544 | 0.684 | 5.689 | 3.829 | 16.6 | 12.616 | 46 |
| February 10, 2021 | 176 | 75.7 | 0.877 | 0.777 | 4.052 | 3.952 | 16.6 | 12.5662 | 46 |
| February 11, 2021 | 177 | 76.1 | 0.932 | 0.709 | 5.416 | 5.193 | 16.7 | 12.7087 | 46 |
| February 12, 2021 | 178 | 75.5 | 1.203 | 0.71 | 5.842 | 5.349 | 16.5 | 12.4575 | 46 |
| February 13, 2021 | 179 | 75.8 | 0.809 | 0.703 | 7.038 | 6.932 | 16.6 | 12.5828 | 46 |
| February 14, 2021 | 180 | 75.7 | 1.183 | 0.783 | 7.607 | 7.207 | 16.6 | 12.5662 | 46 |
| February 15, 2021 | 181 | 75.4 | 1.18 | 0.768 | 5.906 | 5.494 | 16.4 | 12.3656 | 46 |
| February 16, 2021 | 182 | 75.5 | 1.019 | 0.739 | 6.254 | 5.974 | 16.5 | 12.4575 | 46 |
| February 17, 2021 | 183 | 75.5 | 1.32 | 0.723 | 6.328 | 5.731 | 16.5 | 12.4575 | 46 |
| February 18, 2021 | 184 | 75.5 | 0.998 | 0.732 | 7.012 | 6.746 | 16.5 | 12.4575 | 46 |
| February 19, 2021 | 185 | 75.3 | 1.635 | 0.794 | 7.113 | 6.272 | 16.4 | 12.3492 | 46 |
| February 20, 2021 | 186 | 75.5 | 1.852 | 0.807 | 6.084 | 5.039 | 16.5 | 12.4575 | 46 |
| February 21, 2021 | 187 | 75.8 | 1.456 | 0.772 | 6.75 | 6.066 | 16.7 | 12.6586 | 46 |
| February 22, 2021 | 188 | 76 | 1.288 | 0.737 | 6.421 | 5.87 | 16.6 | 12.616 | 46 |
| February 23, 2021 | 189 | 75.8 | 1.122 | 0.764 | 6.465 | 6.107 | 16.7 | 12.6586 | 46 |
| February 24, 2021 | 190 | 75.5 | 1.37 | 0.733 | 6.38 | 5.743 | 16.5 | 12.4575 | 46 |
| February 25, 2021 | 191 | 75.7 | 1.392 | 0.754 | 5.038 | 4.4 | 16.5 | 12.4905 | 46 |
| February 26, 2021 | 192 | 75.7 | 1.504 | 0.707 | 6.168 | 5.371 | 16.5 | 12.4905 | 46 |
| February 27, 2021 | 193 | 75.5 | 0.946 | 0.697 | 6.327 | 6.078 | 16.5 | 12.4575 | 46 |
| February 28, 2021 | 194 | 75.3 | 2.299 | 0.776 | 7.95 | 6.427 | 16.4 | 12.3492 | 46 |
| March 1, 2021 | 195 | 75.5 | 1.085 | 0.753 | 6.5 | 6.168 | 16.5 | 12.4575 | 46 |
| March 2, 2021 | 196 | 75.4 | 1.527 | 0.755 | 6.515 | 5.743 | 16.3 | 12.2902 | 46 |
| March 3, 2021 | 197 | 75.5 | 1.073 | 0.76 | 6.569 | 6.256 | 16.5 | 12.4575 | 46 |
| March 4, 2021 | 198 | 75 | 1.299 | 0.766 | 4.7 | 4.167 | 16.3 | 12.225 | 46 |
| March 5, 2021 | 199 | 75 | 1.376 | 0.785 | 6.416 | 5.825 | 16.4 | 12.3 | 46 |
| March 6, 2021 | 200 | 75.2 | 2.051 | 0.839 | 7.57 | 6.358 | 16.4 | 12.3328 | 46 |
| March 7, 2021 | 201 | 75.8 | 2.239 | 0.72 | 6.405 | 4.886 | 16.7 | 12.6586 | 46 |
| March 8, 2021 | 202 | 76.1 | 1.342 | 0.783 | 5.385 | 4.826 | 16.7 | 12.7087 | 46 |
| March 9, 2021 | 203 | 76.1 | 0.987 | 0.734 | 6.198 | 5.945 | 16.7 | 12.7087 | 46 |
| March 10, 2021 | 204 | 75.5 | 1.605 | 0.755 | 6.799 | 5.949 | 16.5 | 12.4575 | 46 |
| March 11, 2021 | 205 | 75.5 | 1.261 | 0.76 | 6.449 | 5.948 | 16.5 | 12.4575 | 46 |
| March 12, 2021 | 206 | 74.9 | 2.042 | 0.79 | 6.879 | 5.627 | 16.2 | 12.1338 | 46 |
| March 13, 2021 | 207 | 75 | 1.267 | 0.82 | 6.397 | 5.95 | 16.2 | 12.15 | 46 |
| March 14, 2021 | 208 | 75.1 | 1.786 | 0.819 | 8.004 | 7.037 | 16.2 | 12.1662 | 46 |
| March 15, 2021 | 209 | 74.9 | 1.581 | 0.757 | 6.183 | 5.359 | 16.2 | 12.1338 | 46 |
| March 16, 2021 | 210 | 75 | 1.32 | 0.769 | 6.003 | 5.452 | 16.1 | 12.075 | 46 |
| March 17, 2021 | 211 | 74.5 | 1.446 | 0.823 | 6.09 | 5.467 | 16.1 | 11.9945 | 46 |
| March 18, 2021 | 212 | 74.5 | 1.792 | 0.776 | 6.597 | 5.581 | 15.9 | 11.8455 | 46 |
| March 19, 2021 | 213 | 74.9 | 1.278 | 0.825 | 6.715 | 6.262 | 16.2 | 12.1338 | 46 |
| March 20, 2021 | 214 | 75 | 1.929 | 0.881 | 7.691 | 6.643 | 16.2 | 12.15 | 46 |
| March 21, 2021 | 215 | 74.9 | 1.653 | 0.777 | 6.65 | 5.774 | 16.3 | 12.2087 | 46 |
| March 22, 2021 | 216 | 75 | 1.262 | 0.83 | 6.53 | 6.098 | 16.2 | 12.15 | 46 |
| March 23, 2021 | 217 | 75 | 1.231 | 0.771 | 7.08 | 6.62 | 16.2 | 12.15 | 46 |
| March 24, 2021 | 218 | 74.9 | 1.395 | 0.811 | 5.245 | 4.661 | 16.2 | 12.1338 | 46 |
| March 25, 2021 | 219 | 74.8 | 1.404 | 0.774 | 6.149 | 5.519 | 16.2 | 12.1176 | 46 |
| March 26, 2021 | 220 | 75.3 | 1.393 | 0.764 | 6.027 | 5.398 | 16.2 | 12.1986 | 46 |
| March 27, 2021 | 221 | 75.1 | 1.475 | 0.771 | 5.988 | 5.284 | 16.1 | 12.0911 | 46 |
| March 28, 2021 | 222 | 75 | 1.537 | 0.781 | 5.139 | 4.383 | 16.1 | 12.075 | 46 |
| March 29, 2021 | 223 | 75.1 | 0.786 | 0.769 | 5.732 | 5.715 | 16.1 | 12.0911 | 46 |
| March 30, 2021 | 224 | 74.5 | 1.297 | 0.818 | 5.082 | 4.603 | 15.9 | 11.8455 | 46 |
| March 31, 2021 | 225 | 74.2 | 1.716 | 0.789 | 5.645 | 4.718 | 15.8 | 11.7236 | 46 |
| April 1, 2021 | 226 | 74.4 | 1.618 | 0.839 | 5.85 | 5.071 | 15.9 | 11.8296 | 46 |
| April 2, 2021 | 227 | 74.5 | 1.274 | 0.768 | 6.901 | 6.395 | 15.9 | 11.8455 | 46 |
| April 3, 2021 | 228 | 74.6 | 0.804 | 0.721 | 6.312 | 6.229 | 16 | 11.936 | 46 |
| April 4, 2021 | 229 | 74.5 | 1.909 | 0.803 | 7.005 | 5.899 | 15.9 | 11.8455 | 46 |
| April 5, 2021 | 230 | 74.7 | 1.162 | 0.854 | 5.532 | 5.224 | 16 | 11.952 | 46 |
| April 6, 2021 | 231 | 74.2 | 1.463 | 0.872 | 6.288 | 5.697 | 15.7 | 11.6494 | 46 |
| April 7, 2021 | 232 | 74.1 | 1.398 | 0.846 | 7.048 | 6.496 | 15.7 | 11.6337 | 46 |
| April 8, 2021 | 233 | 73.6 | 1.751 | 0.859 | 5.357 | 4.465 | 15.6 | 11.4816 | 46 |
| April 9, 2021 | 234 | 74.1 | 1.172 | 0.816 | 6.293 | 5.937 | 15.7 | 11.6337 | 46 |
| April 10, 2021 | 235 | 73.8 | 1.752 | 0.818 | 7.052 | 6.118 | 15.6 | 11.5128 | 46 |
| April 11, 2021 | 236 | 74.1 | 1.832 | 0.811 | 6.516 | 5.495 | 15.7 | 11.6337 | 46 |
| April 12, 2021 | 237 | 74.3 | 1.261 | 0.868 | 6.443 | 6.05 | 15.9 | 11.8137 | 46 |
| April 13, 2021 | 238 | 74 | 1.383 | 0.817 | 6.895 | 6.329 | 15.7 | 11.618 | 46 |
| April 14, 2021 | 239 | 73.9 | 1.651 | 0.784 | 6.336 | 5.469 | 15.7 | 11.6023 | 46 |
| April 15, 2021 | 240 | 73.7 | 1.658 | 0.813 | 7.175 | 6.33 | 15.6 | 11.4972 | 46 |
| April 16, 2021 | 241 | 73.9 | 0.928 | 0.877 | 6.766 | 6.715 | 15.7 | 11.6023 | 46 |
| April 17, 2021 | 242 | 73.7 | 2.297 | 0.859 | 7.33 | 5.892 | 15.6 | 11.4972 | 46 |
| April 18, 2021 | 243 | 73.9 | 2.473 | 0.885 | 6.776 | 5.188 | 15.8 | 11.6762 | 46 |
| April 19, 2021 | 244 | 74.3 | 1.242 | 0.753 | 6.692 | 6.203 | 15.8 | 11.7394 | 46 |
| April 20, 2021 | 245 | 73.7 | 1.55 | 0.769 | 6.815 | 6.034 | 15.6 | 11.4972 | 46 |
| April 21, 2021 | 246 | 73.7 | 0.782 | 0.771 | 5.838 | 5.827 | 15.5 | 11.4235 | 46 |
| April 22, 2021 | 247 | 73.4 | 1.58 | 0.877 | 6.221 | 5.518 | 15.4 | 11.3036 | 46 |
| April 23, 2021 | 248 | 73.3 | 1.564 | 0.853 | 7.1 | 6.389 | 15.3 | 11.2149 | 46 |
| April 24, 2021 | 249 | 73.4 | 2.465 | 0.849 | 7.802 | 6.186 | 15.4 | 11.3036 | 46 |
| April 25, 2021 | 250 | 73.9 | 2.408 | 0.74 | 7.611 | 5.943 | 15.5 | 11.4545 | 46 |
| April 26, 2021 | 251 | 74.1 | 1.664 | 0.87 | 6.244 | 5.45 | 15.7 | 11.6337 | 46 |
| April 27, 2021 | 252 | 74.2 | 1.486 | 0.853 | 6.062 | 5.429 | 15.6 | 11.5752 | 46 |
| April 28, 2021 | 253 | 73.5 | 0.967 | 0.894 | 6.36 | 6.287 | 15.4 | 11.319 | 46 |
| April 29, 2021 | 254 | 73.4 | 1.231 | 0.89 | 6.349 | 6.008 | 15.4 | 11.3036 | 46 |
| April 30, 2021 | 255 | 73.2 | 1.01 | 0.883 | 7.288 | 7.161 | 15.3 | 11.1996 | 46 |
| May 1, 2021 | 256 | 72.6 | 2.764 | 0.965 | 7.335 | 5.536 | 15 | 10.89 | 46 |
| May 2, 2021 | 257 | 74 | 1.331 | 0.842 | 6.747 | 6.258 | 15.7 | 11.618 | 46 |
| May 3, 2021 | 258 | 73.9 | 1.253 | 0.891 | 6.574 | 6.212 | 15.5 | 11.4545 | 46 |
| May 4, 2021 | 259 | 73.6 | 1.409 | 0.858 | 6.808 | 6.257 | 15.5 | 11.408 | 46 |
| May 5, 2021 | 260 | 73.4 | 1.418 | 0.924 | 6.916 | 6.422 | 15.4 | 11.3036 | 46 |
| May 6, 2021 | 261 | 72.7 | 1.725 | 1.014 | 5.691 | 4.98 | 15.2 | 11.0504 | 46 |
| May 7, 2021 | 262 | 73 | 1.754 | 0.84 | 6.457 | 5.543 | 15.2 | 11.096 | 46 |
| May 8, 2021 | 263 | 72.8 | 2.917 | 1.028 | 8.391 | 6.502 | 15.1 | 10.9928 | 46 |
| May 9, 2021 | 264 | 73.5 | 1.918 | 0.841 | 6.953 | 5.876 | 15.4 | 11.319 | 46 |
| May 10, 2021 | 265 | 73.7 | 0.82 | 0.917 | 6.348 | 6.445 | 15.6 | 11.4972 | 47 |
| May 11, 2021 | 266 | 72.8 | 1.887 | 0.942 | 7.096 | 6.151 | 15.2 | 11.0656 | 47 |
| May 12, 2021 | 267 | 72.9 | 2.01 | 0.856 | 6.356 | 5.202 | 15.3 | 11.1537 | 47 |
| May 13, 2021 | 268 | 72.7 | 1.784 | 0.786 | 5.937 | 4.939 | 15.3 | 11.1231 | 47 |
| May 14, 2021 | 269 | 72.9 | 1.716 | 0.833 | 7.251 | 6.368 | 15.2 | 11.0808 | 47 |
| May 15, 2021 | 270 | 72.8 | 2.728 | 0.991 | 7.775 | 6.038 | 15.3 | 11.1384 | 47 |
| May 16, 2021 | 271 | 73.5 | 1.257 | 0.893 | 5.667 | 5.303 | 15.5 | 11.3925 | 47 |
| May 17, 2021 | 272 | 73.5 | 1.811 | 0.872 | 5.165 | 4.226 | 15.5 | 11.3925 | 47 |
| May 18, 2021 | 273 | 73.5 | 1.459 | 0.912 | 4.505 | 3.958 | 15.5 | 11.3925 | 47 |
| May 19, 2021 | 274 |  | 1.933 | 0.814 | 5.361 | 4.242 | 15.4 | 11.242 | 47 |
| May 20, 2021 | 275 |  | 73 | 1.011 | 6.759 | 5.528 | 15.2 | 11.0808 | 47 |
| May 21, 2021 | 276 | 73.1 | 72.9 | 0.892 | 6.137 | 5.391 | 15.4 | 11.2574 | 47 |
| May 22, 2021 | 277 | 73.1 | 2.479 | 1.098 | 6.373 | 4.992 | 15.3 | 11.1843 | 47 |
| May 23, 2021 | 278 | 74.2 | 0.639 | 0.775 | 5.441 | 5.577 | 15.7 | 11.6494 | 47 |
| May 24, 2021 | 279 | 73.2 | 1.422 | 0.88 | 5.103 | 4.561 | 15.4 | 11.2728 | 47 |
| May 25, 2021 | 280 | 73.1 | 1.591 | 0.802 | 5.312 | 4.523 | 15.4 | 11.2574 | 47 |
| May 26, 2021 | 281 | 72.8 | 1.696 | 0.876 | 5.718 | 4.898 | 15.2 | 11.0656 | 47 |
| May 27, 2021 | 282 | 73 | 1.425 | 0.758 | 7.262 | 6.595 | 15.4 | 11.242 | 47 |
| May 28, 2021 | 283 | 73 | 1.937 | 0.962 | 8.226 | 7.251 | 15.2 | 11.096 | 47 |
| May 29, 2021 | 284 | 72.9 | 2.088 | 1.01 | 6.719 | 5.641 | 15.2 | 11.0808 | 47 |
| May 30, 2021 | 285 | 73 | 1.475 | 0.956 | 6.552 | 6.033 | 15.4 | 11.242 | 47 |
| May 31, 2021 | 286 | 73 | 1.758 | 0.828 | 5.49 | 4.56 | 15.2 | 11.096 | 47 |
| June 1, 2021 | 287 | 73.2 | 1.313 | 0.932 | 5.733 | 5.352 | 15.3 | 11.1996 | 47 |
| June 2, 2021 | 288 | 72.9 | 1.201 | 0.967 | 5.51 | 5.276 | 15.2 | 11.0808 | 47 |
| June 3, 2021 | 289 | 73.1 | 1.611 | 0.91 | 5.947 | 5.246 | 15.3 | 11.1843 | 47 |
| June 4, 2021 | 290 | 73.1 | 2.345 | 1.31 | 7.044 | 6.009 | 15.3 | 11.1843 | 47 |
| June 5, 2021 | 291 | 73.9 | 1.721 | 0.784 | 6.179 | 5.242 | 15.6 | 11.5284 | 47 |
| June 6, 2021 | 292 | 73.3 | 1.64 | 0.8 | 4.732 | 3.892 | 15.3 | 11.2149 | 47 |
| June 7, 2021 | 293 | 73.3 | 1.41 | 0.821 | 6 | 5.411 | 15.3 | 11.2149 | 47 |
| June 8, 2021 | 294 | 73.2 | 1.138 | 0.996 | 6.136 | 5.994 | 15.3 | 11.1996 | 47 |
| June 9, 2021 | 295 | 72.8 | 1.374 | 1.027 | 5.721 | 5.374 | 15.2 | 11.0656 | 47 |
| June 10, 2021 | 296 | 73 | 0.897 | 1.015 | 6.474 | 6.592 | 15.2 | 11.096 | 47 |
| June 11, 2021 | 297 | 73.2 | 1.143 | 1.053 | 6.967 | 6.877 | 15.3 | 11.1996 | 47 |
| June 12, 2021 | 298 | 73.3 | 0.934 | 0.894 | 5.947 | 5.907 | 15.4 | 11.2882 | 47 |
| June 13, 2021 | 299 | 73.5 | 1.359 | 0.778 | 5.065 | 4.484 | 15.5 | 11.3925 | 47 |
| June 14, 2021 | 300 | 73.5 | 1.328 | 0.963 | 7.072 | 6.707 | 15.5 | 11.3925 | 47 |
| June 15, 2021 | 301 | 73 | 1.624 | 0.908 | 5.701 | 4.985 | 15.2 | 11.096 | 47 |
| June 16, 2021 | 302 | 73 | 1.354 | 0.911 | 5.638 | 5.195 | 15.3 | 11.169 | 47 |
| June 17, 2021 | 303 | 72.9 | 1.095 | 0.6 | 5.413 | 4.918 | 15.2 | 11.0808 | 47 |
| June 18, 2021 | 304 | 72.7 | 1.121 | 0.894 | 5.988 | 5.761 | 15.2 | 11.0504 | 47 |
| June 19, 2021 | 305 | 72.5 | 1.49 | 1.154 | 7.444 | 7.108 | 15.1 | 10.9475 | 47 |
| June 20, 2021 | 306 | 73 | 1.721 | 0.749 | 6.806 | 5.834 | 15.2 | 11.096 | 47 |
| June 21, 2021 | 307 | 72.9 | 2.101 | 1.088 | 6.233 | 5.22 | 15.2 | 11.0808 | 47 |
| June 22, 2021 | 308 | 73.4 | 1.617 | 0.903 | 7.278 | 6.564 | 15.4 | 11.3036 | 47 |
| June 23, 2021 | 309 | 72.6 | 1.328 | 0.945 | 6.673 | 6.29 | 15.1 | 10.9626 | 47 |
| June 24, 2021 | 310 | 72.5 | 1.626 | 1.047 | 6.495 | 5.916 | 15.1 | 10.9475 | 47 |
| June 25, 2021 | 311 | 72.8 | 1.907 | 1.017 | 7.203 | 6.313 | 15.2 | 11.0656 | 47 |
| June 26, 2021 | 312 | 72.9 | 2.235 | 1.028 | 8.775 | 7.568 | 15.2 | 11.0808 | 47 |
| June 27, 2021 | 313 | 72.7 | 2.384 | 1.027 | 5.828 | 4.471 | 15.2 | 11.0504 | 47 |
| June 28, 2021 | 314 | 73.5 | 1.273 | 0.96 | 6.964 | 6.651 | 15.5 | 11.3925 | 47 |
| June 29, 2021 | 315 | 72.9 | 2.13 | 0.964 | 5.901 | 4.735 | 15.2 | 11.0808 | 47 |
| June 30, 2021 | 316 | 73.1 | 1.26 | 0.958 | 6.197 | 5.895 | 15.4 | 11.2574 | 47 |
| July 1, 2021 | 317 | 72.8 | 1.349 | 0.991 | 6.534 | 6.176 | 15.2 | 11.0656 | 47 |
| July 2, 2021 | 318 | 72.4 | 1.737 | 0.952 | 7.121 | 6.336 | 14.9 | 10.7876 | 47 |
| July 3, 2021 | 319 | 72.7 | 2.585 | 1.205 | 8.394 | 7.014 | 15.2 | 11.0504 | 47 |
| July 4, 2021 | 320 | 73.6 | 1.551 | 0.786 | 8.695 | 7.93 | 15.6 | 11.4816 | 47 |
| July 5, 2021 | 321 | 73.3 | 1.477 | 0.875 | 6.072 | 5.47 | 15.3 | 11.2149 | 47 |
| July 6, 2021 | 322 | 73.3 | 1.909 | 0.86 | 6.969 | 5.92 | 15.3 | 11.2149 | 47 |
| July 7, 2021 | 323 | 73.4 | 1.46 | 0.824 | 5.972 | 5.336 | 15.4 | 11.3036 | 47 |
| July 8, 2021 | 324 | 73.1 | 2.478 | 0.873 | 7.14 | 5.535 | 15.3 | 11.1843 | 47 |
| July 9, 2021 | 325 | 72.8 | 1.642 | 0.986 | 7.096 | 6.44 | 15.2 | 11.0656 | 47 |
| July 10, 2021 | 326 | 73 | 1.782 | 0.749 | 7.077 | 6.044 | 15.2 | 11.096 | 47 |
| July 11, 2021 | 327 | 73 | 2.003 | 0.155 | 6.407 | 4.559 | 15.2 | 11.096 | 47 |
| July 12, 2021 | 328 | 73.2 | 1.149 | 0.951 | 6.581 | 6.383 | 15.3 | 11.1996 | 47 |
| July 13, 2021 | 329 | 72.7 | 1.912 | 0.942 | 7.464 | 6.494 | 15.2 | 11.0504 | 47 |
| July 14, 2021 | 330 | 72.4 | 1.873 | 0.895 | 6.379 | 5.401 | 14.9 | 10.7876 | 47 |
| July 15, 2021 | 331 | 72.8 | 1.43 | 0.889 | 6.898 | 6.357 | 15.2 | 11.0656 | 47 |
| July 16, 2021 | 332 | 72.7 | 1.759 | 0.973 | 7.349 | 6.563 | 15.2 | 11.0504 | 47 |
| July 17, 2021 | 333 | 72.8 | 2.637 | 1.192 | 8.892 | 7.447 | 15.2 | 11.0656 | 47 |
| July 18, 2021 | 334 | 73.6 | 1.475 | 0.873 | 8.087 | 7.485 | 15.6 | 11.4816 | 47 |
| July 19, 2021 | 335 | 72.9 | 2.367 | 1.008 | 6.593 | 5.234 | 15.2 | 11.0808 | 47 |
| July 20, 2021 | 336 | 72.9 | 1.1 | 0.854 | 5.804 | 5.558 | 15.2 | 11.0808 | 47 |
| July 21, 2021 | 337 | 72.8 | 1.409 | 0.898 | 6.484 | 5.973 | 15.2 | 11.0656 | 47 |
| July 22, 2021 | 338 | 72.5 | 1.406 | 1.002 | 5.33 | 4.926 | 15.1 | 10.9475 | 47 |
| July 23, 2021 | 339 | 73 | 1.548 | 0.972 | 7.233 | 6.657 | 15.2 | 11.096 | 47 |
| July 24, 2021 | 340 | 73 | 1.282 | 1.07 | 7.117 | 6.905 | 15.4 | 11.242 | 47 |
| July 25, 2021 | 341 | 73.2 | 1.253 | 0.941 | 7.734 | 7.422 | 15.4 | 11.2728 | 47 |
| July 26, 2021 | 342 | 72.4 | 2.284 | 0.944 | 9.097 | 7.757 | 15 | 10.86 | 47 |
| July 27, 2021 | 343 | 72.4 | 2.599 | 1.226 | 8.486 | 7.113 | 15 | 10.86 | 47 |
| July 28, 2021 | 344 | 72.8 | 2.665 | 1.035 | 6.955 | 5.325 | 15.2 | 11.0656 | 47 |
| July 29, 2021 | 345 | 72.9 | 1.683 | 1.034 | 6.895 | 6.246 | 15.2 | 11.0808 | 47 |
| July 30, 2021 | 346 | 72.3 | 1.866 | 1.084 | 7.752 | 6.97 | 14.9 | 10.7727 | 47 |
| July 31, 2021 | 347 | 72.8 | 2.759 | 1.312 | 7.163 | 5.716 | 15.2 | 11.0656 | 47 |
| August 1, 2021 | 348 | 74.3 | 1 | 0.811 | 7.269 | 7.08 | 15.9 | 11.8137 | 47 |
| August 2, 2021 | 349 | 73.5 | 1.582 | 0.947 | 7.285 | 6.65 | 15.5 | 11.3925 | 47 |
| August 3, 2021 | 350 | 73.1 | 1.437 | 1.134 | 8.134 | 7.831 | 15.4 | 11.2574 | 47 |
| August 4, 2021 | 351 | 73.1 | 1.489 | 1.145 | 9.205 | 8.861 | 15.4 | 11.2574 | 47 |
| August 5, 2021 | 352 | 73.4 | 1.839 | 1.081 | 8.202 | 7.444 | 15.5 | 11.377 | 47 |
| August 6, 2021 | 353 | 73.2 | 1.828 | 1.338 | 8.72 | 8.23 | 15.3 | 11.1996 | 47 |
| August 7, 2021 | 354 | 73.1 | 2.238 | 0.931 | 7.483 | 6.176 | 15.3 | 11.1843 | 47 |
| August 8, 2021 | 355 | 73.5 | 1.479 | 1.081 | 7.112 | 6.714 | 15.5 | 11.3925 | 47 |
| August 9, 2021 | 356 | 73.4 | 1.79 | 0.916 | 7.073 | 6.199 | 15.5 | 11.377 | 47 |
| August 10, 2021 | 357 | 73.3 | 1.445 | 0.896 | 6.436 | 5.887 | 15.4 | 11.2882 | 47 |
| August 11, 2021 | 358 | 72.8 | 1.718 | 1.043 | 7.453 | 6.778 | 15.2 | 11.0656 | 47 |
| August 12, 2021 | 359 | 72.5 | 1.797 | 1.019 | 7.799 | 7.021 | 15.1 | 10.9475 | 47 |
| August 13, 2021 | 360 | 72.8 | 1.825 | 0.858 | 8.039 | 7.072 | 15.2 | 11.0656 | 47 |
| August 14, 2021 | 361 | 72.6 | 3.464 | 1.208 | 8.734 | 6.478 | 15.2 | 11.0352 | 47 |
| August 15, 2021 | 362 | 74.1 | 1.135 | 0.85 | 5.886 | 5.601 | 15.8 | 11.7078 | 47 |
| August 16, 2021 | 363 | 73.6 | 1.473 | 1.13 | 6.17 | 5.827 | 15.6 | 11.4816 | 47 |
| August 17, 2021 | 364 | 73.5 | 1.69 | 1.08 | 6.475 | 5.865 | 15.5 | 11.3925 | 47 |
| August 18, 2021 | 365 | 73 | 1.358 | 1.023 | 6.965 | 6.63 | 15.2 | 11.096 | 47 |
| August 19, 2021 | 366 | 72.8 | 2.022 | 1.081 | 6.43 | 5.489 | 15.2 | 11.0656 | 47 |
